# Supplementary material for: Randomized, double-blind, controlled trial of human anti-LIGHT monoclonal antibody in COVID-19 acute respiratory distress syndrome
Source: JCI journal article supplement (doi:10.1172/jci153173), 2021-12-06
Supplement: sd2 [file 2]

## ICMJE DISCLOSURE FORM

**Date:** October 5, 2021

**Your Name:** Colleen Anderson

**Manuscript Title:** Randomized, double-blind, controlled trial of human anti-LIGHT monoclonal antibody in COVID-19 acute respiratory distress syndrome

**Manuscript number (if known):** 153173-JCI-CMED-1

In the interest of transparency, we ask you to disclose all relationships/activities/interests listed below that are related to the content of your manuscript. "Related" means any relation with for-profit or not-for-profit third parties whose interests may be affected by the content of the manuscript. Disclosure represents a commitment to transparency and does not necessarily indicate a bias. If you are in doubt about whether to list a relationship/activity/interest, it is preferable that you do so.

The following questions apply to the author's relationships/activities/interests as they relate to the current manuscript only.

The author's relationships/activities/interests should be defined broadly. For example, if your manuscript pertains to the epidemiology of hypertension, you should declare all relationships with manufacturers of antihypertensive medication, even if that medication is not mentioned in the manuscript.

In item #1 below, report all support for the work reported in this manuscript without time limit. For all other items, the time frame for disclosure is the past 36 months.

|                                                           |                                                                                                                                                                                | Name all entities with whom you have this relationship or indicate none (add rows as needed) | Specifications/Comments (e.g., if payments were made to you or to your institution) |
|-----------------------------------------------------------|--------------------------------------------------------------------------------------------------------------------------------------------------------------------------------|----------------------------------------------------------------------------------------------|-------------------------------------------------------------------------------------|
| <b>Time frame: Since the initial planning of the work</b> |                                                                                                                                                                                |                                                                                              |                                                                                     |
| 1                                                         | All support for the present manuscript (e.g., funding, provision of study materials, medical writing, article processing charges, etc.)<br><b>No time limit for this item.</b> | _X_ None                                                                                     |                                                                                     |
|                                                           |                                                                                                                                                                                |                                                                                              |                                                                                     |
|                                                           |                                                                                                                                                                                |                                                                                              |                                                                                     |
|                                                           |                                                                                                                                                                                |                                                                                              |                                                                                     |
|                                                           |                                                                                                                                                                                |                                                                                              |                                                                                     |
|                                                           |                                                                                                                                                                                |                                                                                              |                                                                                     |
| <b>Time frame: past 36 months</b>                         |                                                                                                                                                                                |                                                                                              |                                                                                     |
| 2                                                         | Grants or contracts from any entity (if not indicated in item #1 above).                                                                                                       | _X_ None                                                                                     |                                                                                     |
|                                                           |                                                                                                                                                                                |                                                                                              |                                                                                     |
| 3                                                         | Royalties or licenses                                                                                                                                                          | _X_ None                                                                                     |                                                                                     |
|                                                           |                                                                                                                                                                                |                                                                                              |                                                                                     |

|    |                                                                                                              |                                             |                                                          |
|----|--------------------------------------------------------------------------------------------------------------|---------------------------------------------|----------------------------------------------------------|
|    |                                                                                                              |                                             |                                                          |
| 4  | Consulting fees                                                                                              | <input checked="" type="checkbox"/> None    |                                                          |
|    |                                                                                                              |                                             |                                                          |
|    |                                                                                                              |                                             |                                                          |
| 5  | Payment or honoraria for lectures, presentations, speakers bureaus, manuscript writing or educational events | <input checked="" type="checkbox"/> None    |                                                          |
|    |                                                                                                              |                                             |                                                          |
|    |                                                                                                              |                                             |                                                          |
| 6  | Payment for expert testimony                                                                                 | <input checked="" type="checkbox"/> None    |                                                          |
|    |                                                                                                              |                                             |                                                          |
|    |                                                                                                              |                                             |                                                          |
| 7  | Support for attending meetings and/or travel                                                                 | <input checked="" type="checkbox"/> None    |                                                          |
|    |                                                                                                              |                                             |                                                          |
|    |                                                                                                              |                                             |                                                          |
| 8  | Patents planned, issued or pending                                                                           | <input checked="" type="checkbox"/> None    |                                                          |
|    |                                                                                                              |                                             |                                                          |
|    |                                                                                                              |                                             |                                                          |
| 9  | Participation on a Data Safety Monitoring Board or Advisory Board                                            | <input checked="" type="checkbox"/> None    |                                                          |
|    |                                                                                                              |                                             |                                                          |
|    |                                                                                                              |                                             |                                                          |
| 10 | Leadership or fiduciary role in other board, society, committee or advocacy group, paid or unpaid            | <input checked="" type="checkbox"/> None    |                                                          |
|    |                                                                                                              |                                             |                                                          |
|    |                                                                                                              |                                             |                                                          |
| 11 | Stock or stock options                                                                                       | <input type="checkbox"/> None               |                                                          |
|    |                                                                                                              | Avalo Therapeutics (formerly Cerecor, Inc.) | Hold stock in Avalo Therapeutics, which funded the study |
|    |                                                                                                              |                                             |                                                          |
| 12 | Receipt of equipment, materials, drugs, medical writing, gifts or other services                             | <input checked="" type="checkbox"/> None    |                                                          |
|    |                                                                                                              |                                             |                                                          |
|    |                                                                                                              |                                             |                                                          |
| 13 | Other financial or non-financial interests                                                                   | <input type="checkbox"/> None               |                                                          |
|    |                                                                                                              | Avalo Therapeutics (formerly Cerecor, Inc.) | Employee of Avalo Therapeutics, which funded the study   |
|    |                                                                                                              |                                             |                                                          |

Please place an "X" next to the following statement to indicate your agreement:

I certify that I have answered every question and have not altered the wording of any of the questions on this form.

## ICMJE DISCLOSURE FORM

**Date:** October 5, 2021

**Your Name:** Carl F. Ware

**Manuscript Title:** Randomized, double-blind, controlled trial of human anti-LIGHT monoclonal antibody in COVID-19 acute respiratory distress syndrome

**Manuscript number (if known):** 153173-JCI-CMED-1

In the interest of transparency, we ask you to disclose all relationships/activities/interests listed below that are related to the content of your manuscript. "Related" means any relation with for-profit or not-for-profit third parties whose interests may be affected by the content of the manuscript. Disclosure represents a commitment to transparency and does not necessarily indicate a bias. If you are in doubt about whether to list a relationship/activity/interest, it is preferable that you do so.

The following questions apply to the author's relationships/activities/interests as they relate to the current manuscript only.

The author's relationships/activities/interests should be defined broadly. For example, if your manuscript pertains to the epidemiology of hypertension, you should declare all relationships with manufacturers of antihypertensive medication, even if that medication is not mentioned in the manuscript.

In item #1 below, report all support for the work reported in this manuscript without time limit. For all other items, the time frame for disclosure is the past 36 months.

|                                                           |                                                                                                                                                                                | Name all entities with whom you have this relationship or indicate none (add rows as needed) | Specifications/Comments (e.g., if payments were made to you or to your institution) |
|-----------------------------------------------------------|--------------------------------------------------------------------------------------------------------------------------------------------------------------------------------|----------------------------------------------------------------------------------------------|-------------------------------------------------------------------------------------|
| <b>Time frame: Since the initial planning of the work</b> |                                                                                                                                                                                |                                                                                              |                                                                                     |
| 1                                                         | All support for the present manuscript (e.g., funding, provision of study materials, medical writing, article processing charges, etc.)<br><b>No time limit for this item.</b> | _X_ None                                                                                     |                                                                                     |
|                                                           |                                                                                                                                                                                |                                                                                              |                                                                                     |
|                                                           |                                                                                                                                                                                |                                                                                              |                                                                                     |
|                                                           |                                                                                                                                                                                |                                                                                              |                                                                                     |
|                                                           |                                                                                                                                                                                |                                                                                              |                                                                                     |
|                                                           |                                                                                                                                                                                |                                                                                              |                                                                                     |
| <b>Time frame: past 36 months</b>                         |                                                                                                                                                                                |                                                                                              |                                                                                     |
| 2                                                         | Grants or contracts from any entity (if not indicated in item #1 above).                                                                                                       | _X_ None                                                                                     |                                                                                     |
|                                                           |                                                                                                                                                                                |                                                                                              |                                                                                     |
| 3                                                         | Royalties or licenses                                                                                                                                                          | La Jolla Institute                                                                           | Royalty payment                                                                     |
|                                                           |                                                                                                                                                                                |                                                                                              |                                                                                     |
|                                                           |                                                                                                                                                                                |                                                                                              |                                                                                     |

|    |                                                                                                              |                                          |                                                  |
|----|--------------------------------------------------------------------------------------------------------------|------------------------------------------|--------------------------------------------------|
| 4  | Consulting fees                                                                                              | Avalo Therapeutics                       | Consulting fee                                   |
|    |                                                                                                              |                                          |                                                  |
|    |                                                                                                              |                                          |                                                  |
| 5  | Payment or honoraria for lectures, presentations, speakers bureaus, manuscript writing or educational events | <input checked="" type="checkbox"/> None |                                                  |
|    |                                                                                                              |                                          |                                                  |
|    |                                                                                                              |                                          |                                                  |
| 6  | Payment for expert testimony                                                                                 | <input checked="" type="checkbox"/> None |                                                  |
|    |                                                                                                              |                                          |                                                  |
|    |                                                                                                              |                                          |                                                  |
| 7  | Support for attending meetings and/or travel                                                                 | <input checked="" type="checkbox"/> None |                                                  |
|    |                                                                                                              |                                          |                                                  |
|    |                                                                                                              |                                          |                                                  |
| 8  | Patents planned, issued or pending                                                                           | La Jolla Institute                       | Inventor and issued patent related to anti-LIGHT |
|    |                                                                                                              |                                          |                                                  |
|    |                                                                                                              |                                          |                                                  |
| 9  | Participation on a Data Safety Monitoring Board or Advisory Board                                            | <input checked="" type="checkbox"/> None |                                                  |
|    |                                                                                                              |                                          |                                                  |
|    |                                                                                                              |                                          |                                                  |
| 10 | Leadership or fiduciary role in other board, society, committee or advocacy group, paid or unpaid            | <input checked="" type="checkbox"/> None |                                                  |
|    |                                                                                                              |                                          |                                                  |
|    |                                                                                                              |                                          |                                                  |
| 11 | Stock or stock options                                                                                       | Avalo Therapeutics                       | Stock options                                    |
|    |                                                                                                              |                                          |                                                  |
|    |                                                                                                              |                                          |                                                  |
| 12 | Receipt of equipment, materials, drugs, medical writing, gifts or other services                             | <input checked="" type="checkbox"/> None |                                                  |
|    |                                                                                                              |                                          |                                                  |
|    |                                                                                                              |                                          |                                                  |
| 13 | Other financial or non-financial interests                                                                   | <input checked="" type="checkbox"/> None |                                                  |
|    |                                                                                                              |                                          |                                                  |
|    |                                                                                                              |                                          |                                                  |

Please place an "X" next to the following statement to indicate your agreement:

I certify that I have answered every question and have not altered the wording of any of the questions on this form.

## ICMJE DISCLOSURE FORM

**Date:** October 5, 2021

**Your Name:** David S. Perlin

**Manuscript Title:** Randomized, double-blind, controlled trial of human anti-LIGHT monoclonal antibody in COVID-19 acute respiratory distress syndrome

**Manuscript number (if known):** 153173-JCI-CMED-1

In the interest of transparency, we ask you to disclose all relationships/activities/interests listed below that are related to the content of your manuscript. "Related" means any relation with for-profit or not-for-profit third parties whose interests may be affected by the content of the manuscript. Disclosure represents a commitment to transparency and does not necessarily indicate a bias. If you are in doubt about whether to list a relationship/activity/interest, it is preferable that you do so.

The following questions apply to the author's relationships/activities/interests as they relate to the current manuscript only.

The author's relationships/activities/interests should be defined broadly. For example, if your manuscript pertains to the epidemiology of hypertension, you should declare all relationships with manufacturers of antihypertensive medication, even if that medication is not mentioned in the manuscript.

In item #1 below, report all support for the work reported in this manuscript without time limit. For all other items, the time frame for disclosure is the past 36 months.

|                                                           |                                                                                                                                                                                | Name all entities with whom you have this relationship or indicate none (add rows as needed) | Specifications/Comments (e.g., if payments were made to you or to your institution) |
|-----------------------------------------------------------|--------------------------------------------------------------------------------------------------------------------------------------------------------------------------------|----------------------------------------------------------------------------------------------|-------------------------------------------------------------------------------------|
| <b>Time frame: Since the initial planning of the work</b> |                                                                                                                                                                                |                                                                                              |                                                                                     |
| 1                                                         | All support for the present manuscript (e.g., funding, provision of study materials, medical writing, article processing charges, etc.)<br><b>No time limit for this item.</b> | _X_ None                                                                                     |                                                                                     |
|                                                           |                                                                                                                                                                                |                                                                                              |                                                                                     |
|                                                           |                                                                                                                                                                                |                                                                                              |                                                                                     |
|                                                           |                                                                                                                                                                                |                                                                                              |                                                                                     |
|                                                           |                                                                                                                                                                                |                                                                                              |                                                                                     |
|                                                           |                                                                                                                                                                                |                                                                                              |                                                                                     |
| <b>Time frame: past 36 months</b>                         |                                                                                                                                                                                |                                                                                              |                                                                                     |
| 2                                                         | Grants or contracts from any entity (if not indicated in item #1 above).                                                                                                       | _X_ None                                                                                     |                                                                                     |
|                                                           |                                                                                                                                                                                |                                                                                              |                                                                                     |
| 3                                                         | Royalties or licenses                                                                                                                                                          | _X_ None                                                                                     |                                                                                     |
|                                                           |                                                                                                                                                                                |                                                                                              |                                                                                     |

|    |                                                                                                              |                                          |  |
|----|--------------------------------------------------------------------------------------------------------------|------------------------------------------|--|
|    |                                                                                                              |                                          |  |
| 4  | Consulting fees                                                                                              | <input checked="" type="checkbox"/> None |  |
|    |                                                                                                              |                                          |  |
|    |                                                                                                              |                                          |  |
| 5  | Payment or honoraria for lectures, presentations, speakers bureaus, manuscript writing or educational events | <input checked="" type="checkbox"/> None |  |
|    |                                                                                                              |                                          |  |
|    |                                                                                                              |                                          |  |
| 6  | Payment for expert testimony                                                                                 | <input checked="" type="checkbox"/> None |  |
|    |                                                                                                              |                                          |  |
|    |                                                                                                              |                                          |  |
| 7  | Support for attending meetings and/or travel                                                                 | <input checked="" type="checkbox"/> None |  |
|    |                                                                                                              |                                          |  |
|    |                                                                                                              |                                          |  |
| 8  | Patents planned, issued or pending                                                                           | <input checked="" type="checkbox"/> None |  |
|    |                                                                                                              |                                          |  |
|    |                                                                                                              |                                          |  |
| 9  | Participation on a Data Safety Monitoring Board or Advisory Board                                            | <input checked="" type="checkbox"/> None |  |
|    |                                                                                                              |                                          |  |
|    |                                                                                                              |                                          |  |
| 10 | Leadership or fiduciary role in other board, society, committee or advocacy group, paid or unpaid            | <input checked="" type="checkbox"/> None |  |
|    |                                                                                                              |                                          |  |
|    |                                                                                                              |                                          |  |
| 11 | Stock or stock options                                                                                       | <input checked="" type="checkbox"/> None |  |
|    |                                                                                                              |                                          |  |
|    |                                                                                                              |                                          |  |
| 12 | Receipt of equipment, materials, drugs, medical writing, gifts or other services                             | <input checked="" type="checkbox"/> None |  |
|    |                                                                                                              |                                          |  |
|    |                                                                                                              |                                          |  |
| 13 | Other financial or non-financial interests                                                                   | <input checked="" type="checkbox"/> None |  |
|    |                                                                                                              |                                          |  |
|    |                                                                                                              |                                          |  |

Please place an "X" next to the following statement to indicate your agreement:

I certify that I have answered every question and have not altered the wording of any of the questions on this form.

## ICMJE DISCLOSURE FORM

**Date:** October 5, 2021

**Your Name:** Garry A. Neil

**Manuscript Title:** Randomized, double-blind, controlled trial of human anti-LIGHT monoclonal antibody in COVID-19 acute respiratory distress syndrome

**Manuscript number (if known):** 153173-JCI-CMED-1

In the interest of transparency, we ask you to disclose all relationships/activities/interests listed below that are related to the content of your manuscript. "Related" means any relation with for-profit or not-for-profit third parties whose interests may be affected by the content of the manuscript. Disclosure represents a commitment to transparency and does not necessarily indicate a bias. If you are in doubt about whether to list a relationship/activity/interest, it is preferable that you do so.

The following questions apply to the author's relationships/activities/interests as they relate to the current manuscript only.

The author's relationships/activities/interests should be defined broadly. For example, if your manuscript pertains to the epidemiology of hypertension, you should declare all relationships with manufacturers of antihypertensive medication, even if that medication is not mentioned in the manuscript.

In item #1 below, report all support for the work reported in this manuscript without time limit. For all other items, the time frame for disclosure is the past 36 months.

|                                                           |                                                                                                                                                                                | Name all entities with whom you have this relationship or indicate none (add rows as needed) | Specifications/Comments (e.g., if payments were made to you or to your institution) |
|-----------------------------------------------------------|--------------------------------------------------------------------------------------------------------------------------------------------------------------------------------|----------------------------------------------------------------------------------------------|-------------------------------------------------------------------------------------|
| <b>Time frame: Since the initial planning of the work</b> |                                                                                                                                                                                |                                                                                              |                                                                                     |
| 1                                                         | All support for the present manuscript (e.g., funding, provision of study materials, medical writing, article processing charges, etc.)<br><b>No time limit for this item.</b> | _X_ None                                                                                     |                                                                                     |
|                                                           |                                                                                                                                                                                |                                                                                              |                                                                                     |
|                                                           |                                                                                                                                                                                |                                                                                              |                                                                                     |
|                                                           |                                                                                                                                                                                |                                                                                              |                                                                                     |
|                                                           |                                                                                                                                                                                |                                                                                              |                                                                                     |
|                                                           |                                                                                                                                                                                |                                                                                              |                                                                                     |
| <b>Time frame: past 36 months</b>                         |                                                                                                                                                                                |                                                                                              |                                                                                     |
| 2                                                         | Grants or contracts from any entity (if not indicated in item #1 above).                                                                                                       | _X_ None                                                                                     |                                                                                     |
|                                                           |                                                                                                                                                                                |                                                                                              |                                                                                     |
| 3                                                         | Royalties or licenses                                                                                                                                                          | _X_ None                                                                                     |                                                                                     |
|                                                           |                                                                                                                                                                                |                                                                                              |                                                                                     |

|    |                                                                                                              |                                             |                                                          |
|----|--------------------------------------------------------------------------------------------------------------|---------------------------------------------|----------------------------------------------------------|
|    |                                                                                                              |                                             |                                                          |
| 4  | Consulting fees                                                                                              | <input checked="" type="checkbox"/> None    |                                                          |
|    |                                                                                                              |                                             |                                                          |
|    |                                                                                                              |                                             |                                                          |
| 5  | Payment or honoraria for lectures, presentations, speakers bureaus, manuscript writing or educational events | <input checked="" type="checkbox"/> None    |                                                          |
|    |                                                                                                              |                                             |                                                          |
|    |                                                                                                              |                                             |                                                          |
| 6  | Payment for expert testimony                                                                                 | <input checked="" type="checkbox"/> None    |                                                          |
|    |                                                                                                              |                                             |                                                          |
|    |                                                                                                              |                                             |                                                          |
| 7  | Support for attending meetings and/or travel                                                                 | <input checked="" type="checkbox"/> None    |                                                          |
|    |                                                                                                              |                                             |                                                          |
|    |                                                                                                              |                                             |                                                          |
| 8  | Patents planned, issued or pending                                                                           | <input checked="" type="checkbox"/> None    |                                                          |
|    |                                                                                                              |                                             |                                                          |
|    |                                                                                                              |                                             |                                                          |
| 9  | Participation on a Data Safety Monitoring Board or Advisory Board                                            | <input checked="" type="checkbox"/> None    |                                                          |
|    |                                                                                                              |                                             |                                                          |
|    |                                                                                                              |                                             |                                                          |
| 10 | Leadership or fiduciary role in other board, society, committee or advocacy group, paid or unpaid            | <input checked="" type="checkbox"/> None    |                                                          |
|    |                                                                                                              |                                             |                                                          |
|    |                                                                                                              |                                             |                                                          |
| 11 | Stock or stock options                                                                                       | <input type="checkbox"/> None               |                                                          |
|    |                                                                                                              | Avalo Therapeutics (formerly Cerecor, Inc.) | Hold stock in Avalo Therapeutics, which funded the study |
|    |                                                                                                              |                                             |                                                          |
| 12 | Receipt of equipment, materials, drugs, medical writing, gifts or other services                             | <input checked="" type="checkbox"/> None    |                                                          |
|    |                                                                                                              |                                             |                                                          |
|    |                                                                                                              |                                             |                                                          |
| 13 | Other financial or non-financial interests                                                                   | <input type="checkbox"/> None               |                                                          |
|    |                                                                                                              | Avalo Therapeutics (formerly Cerecor, Inc.) | Employee of Avalo Therapeutics, which funded the study   |
|    |                                                                                                              |                                             |                                                          |

Please place an "X" next to the following statement to indicate your agreement:

I certify that I have answered every question and have not altered the wording of any of the questions on this form.

## ICMJE DISCLOSURE FORM

**Date:** October 5, 2021

**Your Name:** H. Jeffrey Wilkins

**Manuscript Title:** Randomized, double-blind, controlled trial of human anti-LIGHT monoclonal antibody in COVID-19 acute respiratory distress syndrome

**Manuscript number (if known):** 153173-JCI-CMED-1

In the interest of transparency, we ask you to disclose all relationships/activities/interests listed below that are related to the content of your manuscript. "Related" means any relation with for-profit or not-for-profit third parties whose interests may be affected by the content of the manuscript. Disclosure represents a commitment to transparency and does not necessarily indicate a bias. If you are in doubt about whether to list a relationship/activity/interest, it is preferable that you do so.

The following questions apply to the author's relationships/activities/interests as they relate to the current manuscript only.

The author's relationships/activities/interests should be defined broadly. For example, if your manuscript pertains to the epidemiology of hypertension, you should declare all relationships with manufacturers of antihypertensive medication, even if that medication is not mentioned in the manuscript.

In item #1 below, report all support for the work reported in this manuscript without time limit. For all other items, the time frame for disclosure is the past 36 months.

|                                                           |                                                                                                                                                                                | Name all entities with whom you have this relationship or indicate none (add rows as needed) | Specifications/Comments (e.g., if payments were made to you or to your institution) |
|-----------------------------------------------------------|--------------------------------------------------------------------------------------------------------------------------------------------------------------------------------|----------------------------------------------------------------------------------------------|-------------------------------------------------------------------------------------|
| <b>Time frame: Since the initial planning of the work</b> |                                                                                                                                                                                |                                                                                              |                                                                                     |
| 1                                                         | All support for the present manuscript (e.g., funding, provision of study materials, medical writing, article processing charges, etc.)<br><b>No time limit for this item.</b> | _X_ None                                                                                     |                                                                                     |
|                                                           |                                                                                                                                                                                |                                                                                              |                                                                                     |
|                                                           |                                                                                                                                                                                |                                                                                              |                                                                                     |
|                                                           |                                                                                                                                                                                |                                                                                              |                                                                                     |
|                                                           |                                                                                                                                                                                |                                                                                              |                                                                                     |
|                                                           |                                                                                                                                                                                |                                                                                              |                                                                                     |
| <b>Time frame: past 36 months</b>                         |                                                                                                                                                                                |                                                                                              |                                                                                     |
| 2                                                         | Grants or contracts from any entity (if not indicated in item #1 above).                                                                                                       | _X_ None                                                                                     |                                                                                     |
|                                                           |                                                                                                                                                                                |                                                                                              |                                                                                     |
|                                                           |                                                                                                                                                                                |                                                                                              |                                                                                     |
| 3                                                         | Royalties or licenses                                                                                                                                                          | _X_ None                                                                                     |                                                                                     |
|                                                           |                                                                                                                                                                                |                                                                                              |                                                                                     |

|    |                                                                                                              |                                             |                                                          |
|----|--------------------------------------------------------------------------------------------------------------|---------------------------------------------|----------------------------------------------------------|
|    |                                                                                                              |                                             |                                                          |
| 4  | Consulting fees                                                                                              | <input checked="" type="checkbox"/> None    |                                                          |
|    |                                                                                                              |                                             |                                                          |
|    |                                                                                                              |                                             |                                                          |
| 5  | Payment or honoraria for lectures, presentations, speakers bureaus, manuscript writing or educational events | <input checked="" type="checkbox"/> None    |                                                          |
|    |                                                                                                              |                                             |                                                          |
|    |                                                                                                              |                                             |                                                          |
| 6  | Payment for expert testimony                                                                                 | <input checked="" type="checkbox"/> None    |                                                          |
|    |                                                                                                              |                                             |                                                          |
|    |                                                                                                              |                                             |                                                          |
| 7  | Support for attending meetings and/or travel                                                                 | <input checked="" type="checkbox"/> None    |                                                          |
|    |                                                                                                              |                                             |                                                          |
|    |                                                                                                              |                                             |                                                          |
| 8  | Patents planned, issued or pending                                                                           | <input checked="" type="checkbox"/> None    |                                                          |
|    |                                                                                                              |                                             |                                                          |
|    |                                                                                                              |                                             |                                                          |
| 9  | Participation on a Data Safety Monitoring Board or Advisory Board                                            | <input checked="" type="checkbox"/> None    |                                                          |
|    |                                                                                                              |                                             |                                                          |
|    |                                                                                                              |                                             |                                                          |
| 10 | Leadership or fiduciary role in other board, society, committee or advocacy group, paid or unpaid            | <input checked="" type="checkbox"/> None    |                                                          |
|    |                                                                                                              |                                             |                                                          |
|    |                                                                                                              |                                             |                                                          |
| 11 | Stock or stock options                                                                                       | <input type="checkbox"/> None               |                                                          |
|    |                                                                                                              | Avalo Therapeutics (formerly Cerecor, Inc.) | Hold stock in Avalo Therapeutics, which funded the study |
|    |                                                                                                              |                                             |                                                          |
| 12 | Receipt of equipment, materials, drugs, medical writing, gifts or other services                             | <input checked="" type="checkbox"/> None    |                                                          |
|    |                                                                                                              |                                             |                                                          |
|    |                                                                                                              |                                             |                                                          |
| 13 | Other financial or non-financial interests                                                                   | <input type="checkbox"/> None               |                                                          |
|    |                                                                                                              | Avalo Therapeutics (formerly Cerecor, Inc.) | Employee of Avalo Therapeutics, which funded the study   |
|    |                                                                                                              |                                             |                                                          |

Please place an "X" next to the following statement to indicate your agreement:

I certify that I have answered every question and have not altered the wording of any of the questions on this form.

## ICMJE DISCLOSURE FORM

**Date:** October 5, 2021

**Your Name:** Inbal Zafir-Lavie

**Manuscript Title:** Randomized, double-blind, controlled trial of human anti-LIGHT monoclonal antibody in COVID-19 acute respiratory distress syndrome

**Manuscript number (if known):** 153173-JCI-CMED-1

In the interest of transparency, we ask you to disclose all relationships/activities/interests listed below that are related to the content of your manuscript. "Related" means any relation with for-profit or not-for-profit third parties whose interests may be affected by the content of the manuscript. Disclosure represents a commitment to transparency and does not necessarily indicate a bias. If you are in doubt about whether to list a relationship/activity/interest, it is preferable that you do so.

The following questions apply to the author's relationships/activities/interests as they relate to the current manuscript only.

The author's relationships/activities/interests should be defined broadly. For example, if your manuscript pertains to the epidemiology of hypertension, you should declare all relationships with manufacturers of antihypertensive medication, even if that medication is not mentioned in the manuscript.

In item #1 below, report all support for the work reported in this manuscript without time limit. For all other items, the time frame for disclosure is the past 36 months.

|                                                           |                                                                                                                                                                                | Name all entities with whom you have this relationship or indicate none (add rows as needed) | Specifications/Comments (e.g., if payments were made to you or to your institution) |
|-----------------------------------------------------------|--------------------------------------------------------------------------------------------------------------------------------------------------------------------------------|----------------------------------------------------------------------------------------------|-------------------------------------------------------------------------------------|
| <b>Time frame: Since the initial planning of the work</b> |                                                                                                                                                                                |                                                                                              |                                                                                     |
| 1                                                         | All support for the present manuscript (e.g., funding, provision of study materials, medical writing, article processing charges, etc.)<br><b>No time limit for this item.</b> | _X_ None                                                                                     |                                                                                     |
|                                                           |                                                                                                                                                                                |                                                                                              |                                                                                     |
|                                                           |                                                                                                                                                                                |                                                                                              |                                                                                     |
|                                                           |                                                                                                                                                                                |                                                                                              |                                                                                     |
|                                                           |                                                                                                                                                                                |                                                                                              |                                                                                     |
|                                                           |                                                                                                                                                                                |                                                                                              |                                                                                     |
| <b>Time frame: past 36 months</b>                         |                                                                                                                                                                                |                                                                                              |                                                                                     |
| 2                                                         | Grants or contracts from any entity (if not indicated in item #1 above).                                                                                                       | _X_ None                                                                                     |                                                                                     |
|                                                           |                                                                                                                                                                                |                                                                                              |                                                                                     |
|                                                           |                                                                                                                                                                                |                                                                                              |                                                                                     |
| 3                                                         | Royalties or licenses                                                                                                                                                          | _X_ None                                                                                     |                                                                                     |
|                                                           |                                                                                                                                                                                |                                                                                              |                                                                                     |

|    |                                                                                                              |                                                |                                                               |
|----|--------------------------------------------------------------------------------------------------------------|------------------------------------------------|---------------------------------------------------------------|
|    |                                                                                                              |                                                |                                                               |
| 4  | Consulting fees                                                                                              | <input checked="" type="checkbox"/> None       |                                                               |
|    |                                                                                                              | Avalo Therapeutics<br>(formerly Cerecor, Inc.) | Paid consultant to Avalo Therapeutics, which funded the study |
|    |                                                                                                              |                                                |                                                               |
| 5  | Payment or honoraria for lectures, presentations, speakers bureaus, manuscript writing or educational events | <input checked="" type="checkbox"/> None       |                                                               |
|    |                                                                                                              |                                                |                                                               |
|    |                                                                                                              |                                                |                                                               |
| 6  | Payment for expert testimony                                                                                 | <input checked="" type="checkbox"/> None       |                                                               |
|    |                                                                                                              |                                                |                                                               |
|    |                                                                                                              |                                                |                                                               |
| 7  | Support for attending meetings and/or travel                                                                 | <input checked="" type="checkbox"/> None       |                                                               |
|    |                                                                                                              |                                                |                                                               |
|    |                                                                                                              |                                                |                                                               |
| 8  | Patents planned, issued or pending                                                                           | <input checked="" type="checkbox"/> None       |                                                               |
|    |                                                                                                              |                                                |                                                               |
|    |                                                                                                              |                                                |                                                               |
| 9  | Participation on a Data Safety Monitoring Board or Advisory Board                                            | <input checked="" type="checkbox"/> None       |                                                               |
|    |                                                                                                              |                                                |                                                               |
|    |                                                                                                              |                                                |                                                               |
| 10 | Leadership or fiduciary role in other board, society, committee or advocacy group, paid or unpaid            | <input checked="" type="checkbox"/> None       |                                                               |
|    |                                                                                                              |                                                |                                                               |
|    |                                                                                                              |                                                |                                                               |
| 11 | Stock or stock options                                                                                       | <input checked="" type="checkbox"/> None       |                                                               |
|    |                                                                                                              |                                                |                                                               |
|    |                                                                                                              |                                                |                                                               |
| 12 | Receipt of equipment, materials, drugs, medical writing, gifts or other services                             | <input checked="" type="checkbox"/> None       |                                                               |
|    |                                                                                                              |                                                |                                                               |
|    |                                                                                                              |                                                |                                                               |
| 13 | Other financial or non-financial interests                                                                   | <input checked="" type="checkbox"/> None       |                                                               |
|    |                                                                                                              |                                                |                                                               |
|    |                                                                                                              |                                                |                                                               |

Please place an "X" next to the following statement to indicate your agreement:

I certify that I have answered every question and have not altered the wording of any of the questions on this form.

## ICMJE DISCLOSURE FORM

**Date:** October 5, 2021

**Your Name:** Shane Raines

**Manuscript Title:** Randomized, double-blind, controlled trial of human anti-LIGHT monoclonal antibody in COVID-19 acute respiratory distress syndrome

**Manuscript number (if known):** 153173-JCI-CMED-1

In the interest of transparency, we ask you to disclose all relationships/activities/interests listed below that are related to the content of your manuscript. "Related" means any relation with for-profit or not-for-profit third parties whose interests may be affected by the content of the manuscript. Disclosure represents a commitment to transparency and does not necessarily indicate a bias. If you are in doubt about whether to list a relationship/activity/interest, it is preferable that you do so.

The following questions apply to the author's relationships/activities/interests as they relate to the current manuscript only.

The author's relationships/activities/interests should be defined broadly. For example, if your manuscript pertains to the epidemiology of hypertension, you should declare all relationships with manufacturers of antihypertensive medication, even if that medication is not mentioned in the manuscript.

In item #1 below, report all support for the work reported in this manuscript without time limit. For all other items, the time frame for disclosure is the past 36 months.

|                                                           |                                                                                                                                                                                | Name all entities with whom you have this relationship or indicate none (add rows as needed) | Specifications/Comments (e.g., if payments were made to you or to your institution) |
|-----------------------------------------------------------|--------------------------------------------------------------------------------------------------------------------------------------------------------------------------------|----------------------------------------------------------------------------------------------|-------------------------------------------------------------------------------------|
| <b>Time frame: Since the initial planning of the work</b> |                                                                                                                                                                                |                                                                                              |                                                                                     |
| 1                                                         | All support for the present manuscript (e.g., funding, provision of study materials, medical writing, article processing charges, etc.)<br><b>No time limit for this item.</b> | _X_ None                                                                                     |                                                                                     |
|                                                           |                                                                                                                                                                                |                                                                                              |                                                                                     |
|                                                           |                                                                                                                                                                                |                                                                                              |                                                                                     |
|                                                           |                                                                                                                                                                                |                                                                                              |                                                                                     |
|                                                           |                                                                                                                                                                                |                                                                                              |                                                                                     |
|                                                           |                                                                                                                                                                                |                                                                                              |                                                                                     |
| <b>Time frame: past 36 months</b>                         |                                                                                                                                                                                |                                                                                              |                                                                                     |
| 2                                                         | Grants or contracts from any entity (if not indicated in item #1 above).                                                                                                       | _X_ None                                                                                     |                                                                                     |
|                                                           |                                                                                                                                                                                |                                                                                              |                                                                                     |
|                                                           |                                                                                                                                                                                |                                                                                              |                                                                                     |
| 3                                                         | Royalties or licenses                                                                                                                                                          | _X_ None                                                                                     |                                                                                     |
|                                                           |                                                                                                                                                                                |                                                                                              |                                                                                     |

|    |                                                                                                              |                                                |                                                               |
|----|--------------------------------------------------------------------------------------------------------------|------------------------------------------------|---------------------------------------------------------------|
|    |                                                                                                              |                                                |                                                               |
| 4  | Consulting fees                                                                                              | <input checked="" type="checkbox"/> None       |                                                               |
|    |                                                                                                              | Avalo Therapeutics<br>(formerly Cerecor, Inc.) | Paid consultant to Avalo Therapeutics, which funded the study |
|    |                                                                                                              |                                                |                                                               |
| 5  | Payment or honoraria for lectures, presentations, speakers bureaus, manuscript writing or educational events | <input checked="" type="checkbox"/> None       |                                                               |
|    |                                                                                                              |                                                |                                                               |
|    |                                                                                                              |                                                |                                                               |
| 6  | Payment for expert testimony                                                                                 | <input checked="" type="checkbox"/> None       |                                                               |
|    |                                                                                                              |                                                |                                                               |
|    |                                                                                                              |                                                |                                                               |
| 7  | Support for attending meetings and/or travel                                                                 | <input checked="" type="checkbox"/> None       |                                                               |
|    |                                                                                                              |                                                |                                                               |
|    |                                                                                                              |                                                |                                                               |
| 8  | Patents planned, issued or pending                                                                           | <input checked="" type="checkbox"/> None       |                                                               |
|    |                                                                                                              |                                                |                                                               |
|    |                                                                                                              |                                                |                                                               |
| 9  | Participation on a Data Safety Monitoring Board or Advisory Board                                            | <input checked="" type="checkbox"/> None       |                                                               |
|    |                                                                                                              |                                                |                                                               |
|    |                                                                                                              |                                                |                                                               |
| 10 | Leadership or fiduciary role in other board, society, committee or advocacy group, paid or unpaid            | <input checked="" type="checkbox"/> None       |                                                               |
|    |                                                                                                              |                                                |                                                               |
|    |                                                                                                              |                                                |                                                               |
| 11 | Stock or stock options                                                                                       | <input checked="" type="checkbox"/> None       |                                                               |
|    |                                                                                                              |                                                |                                                               |
|    |                                                                                                              |                                                |                                                               |
| 12 | Receipt of equipment, materials, drugs, medical writing, gifts or other services                             | <input checked="" type="checkbox"/> None       |                                                               |
|    |                                                                                                              |                                                |                                                               |
|    |                                                                                                              |                                                |                                                               |
| 13 | Other financial or non-financial interests                                                                   | <input checked="" type="checkbox"/> None       |                                                               |
|    |                                                                                                              |                                                |                                                               |
|    |                                                                                                              |                                                |                                                               |

Please place an "X" next to the following statement to indicate your agreement:

I certify that I have answered every question and have not altered the wording of any of the questions on this form.
